# Supplementary material for: Ag–Au bimetallic nanoclusters formed from a homogeneous gas phase: a new thermodynamic expression confirmed by molecular dynamics simulation
Source: Royal Society of Chemistry journal article supplement (doi:10.1039/c6cp08508c), 2017-01-01
Supplement: c6cp08508c1.pdf [file c6cp08508c1.pdf]

## Supporting Information

### Appendix (I)

#### Details for derivation of Equation (1):

The goal of this section is derivation of an expression for probability of formation of an  $N$ -atom nanocluster containing  $N_A$  atom of metal A and  $N_B$  atom of metal B from the gas phase. Let  $N_A^*$  and  $N_B^*$  be the initial number of atoms A, and B in gas phase. Thus we have:

$$\begin{cases} N_A^* + N_B^* = N^* \\ N_A + N_B = N \end{cases} \quad (\text{S1})$$

where  $N_A^*$  and  $N_B^*$  are constant values. Now, the random formation of an  $N$ -atom nanocluster is considered. Suppose that first  $N_A^*$  atoms of A and then  $N_B^*$  atoms of B join together to form the nanocluster. The probability of this process can be obtained as:

$$P_N = \left( \frac{N_A^*}{N^*} \right) \left( \frac{N_A^* - 1}{N^* - 1} \right) \left( \frac{N_A^* - 2}{N^* - 2} \right) \cdots \left( \frac{N_A^* - N_A + 1}{N^* - N_A + 1} \right) \times \quad (\text{S2})$$

$$\left( \frac{N_B^*}{N^* - N_A} \right) \left( \frac{N_B^* - 1}{N^* - N_A - 1} \right) \left( \frac{N_B^* - 2}{N^* - N_A - 2} \right) \cdots \left( \frac{N_B^* - N_B + 1}{N^* - N_A - N_B + 1} \right)$$

Please note that the order of addition of atoms A and B can not affect this probability. Using Equation (S1) we have:

$$P_N = \frac{N_A^*! N_B^*! (N^* - N_A - N_B)!}{(N_A^* - N_A)! (N_B^* - N_B)! N^*!} \quad (\text{S3})$$

As mentioned above, change in order of addition of A and B atoms does not affect  $P_N$ . Therefore, in order to find total probability of formation of a  $N$ -atom nanocluster containing  $N_A$  atom A and  $N_B$  atom B,  $P(N_A, N)$ , all of the probabilities  $P_N$  for all of the various orders for addition of atoms A and B should be summed. Since, all of the mentioned  $P_N$  values are equal, the ways for various orders for addition of atoms A and B is required to be considered. Then we have:

$$P(N_A, N) = \frac{N!}{N_A! N_B!} P_N \quad (S4)$$

Using Equation (S1) one can write Equation (S4) as follows:

$$P(N_A, N) = \frac{N!}{N_A! (N - N_A)!} \frac{N_A^*! (N^* - N_A^*)! (N^* - N)!}{(N_A^* - N_A)! (N^* - N_A^* - N + N_A)! N^*!} \quad (S5)$$

This equation expresses the probability of formation of a  $N$ -atom cluster. The advantage of this expression is introducing a random limit for cluster formation in gas phase, in such a way that various clusters obtained by molecular simulation methods can be tested by this equation in order to reach a measure of randomness in the simulated system. Also, Equation (S5) can be rewritten as:

$$P(N_A, N) = \frac{W_{clus} \times W_{res}}{W^*} \quad (S6)$$

where:

$$W_{clus} = \frac{N!}{N_A! \times N_B!} \quad (S7)$$

$$W_{res} = \frac{(N^* - N)!}{(N_A^* - N_A)! \times (N_B^* - N_B)!} \quad (S8)$$

$$W^* = \frac{N^*!}{N_A^*! \times N_B^*!} \quad (S9)$$

In above Equations,  $W_{clus}$  is the ways of distribution of A and B atoms in the solid-like cluster,  $W_{res}$  in the ways of distribution of residual A and B atoms in the gas phase if the gas phase to be considered as another solid-like cluster, and finally  $W^*$  is the ways of distribution of A and B atoms in the gas phase of initial state if the initial gas phase is assumed as a solid-like cluster containing  $N_A^*$  atoms of A and  $N_B^*$  atoms of B.

## Appendix (II)

### Details for derivation of Equation (3):

In this section, formation of a  $N$ -atom nanocluster in a thermodynamic viewpoint is discussed. Suppose that the system contains  $N_A^*$  atoms of type A,  $N_B^*$  atoms of type B and  $N_C$  atoms of inert gas C in constant temperature ( $T$ ) and total volume ( $V$ ). Since, total number of atoms is constant, thermodynamic potential of the system is Helmholtz function ( $F$ ). The formation of a  $N$ -atom cluster from atoms A and B can be considered as the following simple reaction:

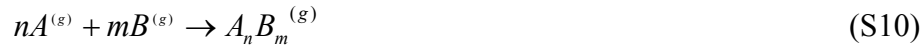

where (g) superscript represents the gas phase. The total Helmholtz free energy of the system before and after cluster formation ( $F_1$ , and  $F_2$ ) can be expressed as:<sup>40</sup>

$$F_1 = N_A^* \mu_A^* + N_B^* \mu_B^* + N_C \mu_C \quad (S11)$$

$$F_2 = (N_A^* - n) \mu_A + (N_B^* - m) \mu_B + N_C \mu_C + F_{clus} + 4\pi r^2 \gamma \quad (S12)$$

where  $\mu_A$ ,  $\mu_B$ , and  $F_{clus}$  are the chemical potentials A, B, and Helmholtz energy of the created nanocluster, respectively. Also, star(\*) superscript represents the initial state in the gas phase. In Equation (S12) the nanocluster assumed to be spherical with radius  $r$ , and  $\gamma$  is surface tension between the nanocluster and C gas. Hence, Helmholtz free energy for formation of  $A_nB_m$  nanocluster,  $\Delta F(n, m)$ , can be obtained as:

$$\Delta F(n, m) = (N_A^* - n) \mu_A + (N_B^* - m) \mu_B + F_{clus}(n, m) + 4\pi r^2 \gamma - N_A^* \mu_A^* - N_B^* \mu_B^* \quad (S13)$$

In this relation,  $F_{clus}(n, m)$  should be determined. The Helmholtz free energy of the nanocluster can be obtained by characteristic function of canonical ensemble:<sup>41</sup>

$$F_{clus} = -kT \ln Q_{clus} + U_0(\rho) \quad (S14)$$

where  $k$  is the Boltzmann constant and  $U_0$  is total intermolecular potential of the nanocluster which is a function of cluster density ( $\rho$ ).  $Q_{clus}$  is total partition function of the  $N$ -atom nanocluster which can be expressed as:

$$Q_{clus} = \frac{N!}{n!m!} Q_{ele} Q_{vib} \quad (S15)$$

Please note that  $N = n + m$ . In this equation “ele” and “vib” subscripts represent electronic and vibrational contributions in  $Q_{clus}$ . Also, the first term of equation (S15) is the ways of distribution of  $n$  atoms of A and  $m$  atoms of B in a solid-like nanocluster. The vibrational partition function of the nanocluster can be written as:

$$\ln Q_{vib} = -\int_0^\infty \left[ \ln \left( 1 - e^{-\frac{h\nu}{kT}} \right) + \frac{h\nu}{2kT} \right] g(\nu) d\nu \quad (S16)$$

where  $\nu$  is the phonon frequency and  $g(\nu)$  is its dispersion function. The simplest way to obtain vibrational partition function of the nanocluster is using of Einstein’s theory of solid phonons:<sup>41</sup>

$$g(\nu) = 3N\delta(\nu - \nu_E) \quad (S17)$$

In this relation  $\delta(\nu - \nu_E)$  is Dirac delta-function and  $\nu_E$  is the Einstein frequency. Substitution of Equation (S17) in Equation (S16) and using the integration properties of Dirac delta function one obtains:

$$\ln Q_{vib} = -N \left[ \ln \left( 1 - e^{-\frac{h\nu_E}{kT}} \right) + \frac{h\nu_E}{2kT} \right] \quad (S18)$$

Hence, using Stirling’s approximation Helmholtz free energy of the nanocluster can be written as:

$$F_{clus}(n, m) = -kT \{ (n+m) \ln(n+m) - m \ln m - n \ln n - (n+m) \ln \left( 1 - e^{-\frac{h\nu_E}{kT}} \right) - (n+m) \frac{h\nu_E}{2kT} \} + U_0(\rho) \quad (S19)$$

If volume of the initial system to be large enough, distances between atoms are faraway and with a good approximation, various gas particles can be viewed as ideal gases. Therefore, chemical potentials of particle  $i$  in gas phase and its partial pressure,  $P_i$  can be expressed as:

$$\mu_i = \mu_i^\theta + kT \ln \left( \frac{P_i}{P^\theta} \right) \quad (S20)$$

$$P_i = \frac{N_i kT}{V} \quad (\text{S21})$$

where  $\theta$  superscript indicates the standard conditions. Now, using Equations (S13), (S19), (S20), and (S21) Helmholtz free energy for formation of the nanocluster becomes:

$$\begin{aligned} \Delta F(n, m) = & (N_A^* - n) \left( \mu_A^\theta + kT \ln \frac{(N_A^* - n)kT}{VP^\theta} \right) + (N_B^* - m) \left( \mu_B^\theta + kT \ln \frac{(N_B^* - m)kT}{VP^\theta} \right) - \\ & kT \{ (n+m) \ln(n+m) - m \ln m - n \ln n - (n+m) \ln \left( 1 - e^{-h\nu_E/kT} \right) - (n+m) \frac{h\nu_E}{2kT} \} + \quad (\text{S22}) \\ & 4\pi r^2 + U_0(\rho) - N_A^* \left( \mu_A^\theta + kT \ln \frac{N_A^* kT}{VP^\theta} \right) - N_B^* \left( \mu_B^\theta + kT \ln \frac{N_B^* kT}{VP^\theta} \right) \end{aligned}$$

Here, differentiation of  $\Delta F(n, m)$  with respect to  $n$  and  $m$  can give us the composition of the nanocluster with minimum free energy:

$$\begin{cases} \left( \frac{\partial \Delta F}{\partial n} \right)_m = 0 \\ \left( \frac{\partial \Delta F}{\partial m} \right)_n = 0 \end{cases} \quad (\text{S23})$$

In order to differentiation of Equation (S22) respect to  $n$  and  $m$ , dependency of  $r$  to  $m$  and  $n$  should be determined. If the volume of the cluster,  $V_{\text{clus}}$  is considered as a linear function of its total number of atoms:

$$V_{\text{clus}} = \alpha N \quad (\text{S24})$$

and using the relation between the volume and surface of a sphere one can obtain:

$$4\pi r^2 = 4\pi \left[ \frac{3\alpha}{4\pi} (n+m) \right]^{2/3} = \alpha' (n+m)^{2/3} \quad (\text{S25})$$

Also, by considering:

$$f(T) = \left( 1 - e^{-h\nu_E/kT} \right) e^{h\nu_E/2kT} \quad (\text{S26})$$

Then using Equations (S22), (S23), (S25), and (S26) the following expressions are obtained:

$$-\mu_A^\theta - kT \ln \left[ \frac{(N_A^* - n)(n + m)kT}{nf(T)VP^\theta} \right] + \frac{3}{2} \gamma \alpha' (n + m)^{1/2} = 0 \quad (\text{S27})$$

$$-\mu_B^\theta - kT \ln \left[ \frac{(N_B^* - n)(n + m)kT}{mf(T)VP^\theta} \right] + \frac{3}{2} \gamma \alpha' (n + m)^{1/2} = 0 \quad (\text{S28})$$

or another form:

$$\frac{(N_A^* - n)(n + m)kT}{nf(T)VP^\theta} = e^{-\mu_A^\theta / kT} \times e^{\frac{-3}{2kT} \gamma \alpha' (n + m)^{1/2}} \quad (\text{S29})$$

$$\frac{(N_B^* - n)(n + m)kT}{mf(T)VP^\theta} = e^{-\mu_B^\theta / kT} \times e^{\frac{-3}{2kT} \gamma \alpha' (n + m)^{1/2}} \quad (\text{S30})$$

by dividing Equation (S29) to Equation (S30) the following simple equation is obtained:

$$\frac{m(N_A^* - n)}{n(N_B^* - m)} = \exp \left\{ \frac{-(\mu_A^\theta - \mu_B^\theta)}{kT} \right\} = \beta(T) \quad (\text{S31})$$

Rearrangement of Equation (29) leads to a simple relation between  $n$  and  $m$  at constant  $N^*$ ,  $V$ , and  $T$  conditions:

$$m = \frac{\beta N_B^* n}{(N_A^* - n + \beta n)} \quad (\text{S32})$$

where  $\beta$  is an adjustable parameter.

### Appendix (III)

Equations for calculation of Order parameter Q6 used in this study:

$$q_{lm}(i) = \frac{1}{N_b(i)} \sum_{j=1}^{N_b(i)} Y_l^m(r_{ij}) \quad (\text{S33})$$

$$q_l(i) = \sqrt{\frac{4\pi}{2l+1} \sum_{m=-l}^{+l} |q_{lm}(i)|^2} \quad (\text{S34})$$

$$Q_l(i) = \frac{1}{\tau_\alpha} \int_{t_0}^{t+\tau_\alpha} q_l(i) dt \quad (\text{S35})$$

where  $i$ 'th atom is surrounded by  $N_b(i)$  atoms within the cutoff distance,  $r_{ij}$  is the distance between  $i$ 'th atom and one of the surrounding atoms ( $j$ ),  $Y_{lm}(r_{ij})$  is the spherical harmonic within distance, and  $q_{lm}(i)$  is the average of spherical harmonics around atom  $i$  within the cutoff range. Also,  $t_0$  is a reference time and  $\tau_\alpha$  is the time interval.

## Tables

Table S1:  $N$ ,  $N_{\text{Ag}}$ ,  $N_{\text{Au}}$ , and  $Q_6$  parameter for pure Ag nanoclusters ( $N_{\text{Ag}}^*=2000$  system) obtained from MD simulations at 5, 7.5, 10, 15, 20, 25, and 30 ns of simulation time.

| time (ns) | $N_{\text{Ag}}$ | $N_{\text{Au}}$ | $N$  | $x_{\text{Ag}}$ | $Q_6$ |
|-----------|-----------------|-----------------|------|-----------------|-------|
| 5         | 1458            | 0               | 1458 | 1               | 0.664 |
| 5         | 89              | 0               | 89   | 1               | 0.63  |
| 5         | 453             | 0               | 453  | 1               | 0.65  |
| 7.5       | 1547            | 0               | 1547 | 1               | 0.66  |
| 7.5       | 453             | 0               | 453  | 1               | 0.65  |
| 10        | 2000            | 0               | 2000 | 1               | 0.663 |
| 15        | 2000            | 0               | 2000 | 1               | 0.663 |
| 20        | 2000            | 0               | 2000 | 1               | 0.663 |
| 25        | 2000            | 0               | 2000 | 1               | 0.663 |
| 30        | 2000            | 0               | 2000 | 1               | 0.663 |



Table S2: The same as Table S1 accompanied by  $P(N_{\text{Ag}}, N)$  for  $N_{\text{Ag}}^*=400$  system in .

| time (ns) | $N$  | $N_{\text{Au}}$ | $N_{\text{Ag}}$ | $x_{\text{Ag}}$ | $Q_6$ | $P(N_{\text{Ag}}, N)$ |
|-----------|------|-----------------|-----------------|-----------------|-------|-----------------------|
| 5         | 29   | 28              | 1               | 0.03            | 0.65  | 0.029                 |
| 5         | 133  | 121             | 12              | 0.09            | 0.61  | 0.002                 |
| 5         | 417  | 314             | 103             | 0.25            | 0.58  | 0.03                  |
| 5         | 193  | 150             | 43              | 0.22            | 0.59  | 0.713                 |
| 5         | 114  | 84              | 30              | 0.26            | 0.65  | 0.244                 |
| 5         | 56   | 37              | 19              | 0.34            | 0.65  | 0.047                 |
| 5         | 241  | 197             | 44              | 0.18            | 0.58  | 0.767                 |
| 5         | 206  | 170             | 36              | 0.17            | 0.58  | 0.624                 |
| 5         | 611  | 499             | 112             | 0.18            | 0.58  | 0.46                  |
| 7.5       | 1087 | 894             | 193             | 0.18            | 0.57  | 0.024                 |
| 7.5       | 56   | 37              | 19              | 0.34            | 0.65  | 0.047                 |
| 7.5       | 664  | 519             | 145             | 0.22            | 0.58  | 0.354                 |
| 7.5       | 193  | 150             | 43              | 0.22            | 0.59  | 0.713                 |
| 10        | 1807 | 1450            | 357             | 0.2             | 0.58  | 0.713                 |
| 10        | 193  | 150             | 43              | 0.22            | 0.59  | 0.713                 |
| 15        | 1807 | 1450            | 357             | 0.2             | 0.58  | 0.713                 |
| 15        | 193  | 150             | 43              | 0.22            | 0.58  | 0.713                 |
| 20        | 1807 | 1450            | 357             | 0.2             | 0.58  | 0.713                 |
| 20        | 193  | 150             | 43              | 0.22            | 0.58  | 0.713                 |
| 25        | 1807 | 1450            | 357             | 0.2             | 0.58  | 0.713                 |
| 25        | 193  | 150             | 43              | 0.22            | 0.58  | 0.713                 |
| 30        | 2000 | 1600            | 400             | 0.2             | 0.58  | 0.713                 |

Table S3: The same as Table S2 for  $N_{\text{Ag}}^*=800$  system.

| time (ns) | $N$  | $N_{\text{Au}}$ | $N_{\text{Ag}}$ | $x_{\text{Ag}}$ | $Q_6$ | $P(N_{\text{Ag}}, N)$ |
|-----------|------|-----------------|-----------------|-----------------|-------|-----------------------|
| 5         | 57   | 41              | 16              | 0.28            | 0.65  | 0.162                 |
| 5         | 171  | 106             | 65              | 0.38            | 0.6   | 0.857                 |
| 5         | 211  | 128             | 83              | 0.39            | 0.58  | 0.979                 |
| 5         | 547  | 324             | 223             | 0.41            | 0.58  | 0.912                 |
| 5         | 172  | 118             | 54              | 0.31            | 0.58  | 0.051                 |
| 5         | 61   | 32              | 29              | 0.48            | 0.65  | 0.48                  |
| 5         | 781  | 451             | 330             | 0.42            | 0.58  | 0.258                 |
| 7.5       | 443  | 266             | 177             | 0.4             | 0.58  | 0.999                 |
| 7.5       | 172  | 118             | 54              | 0.31            | 0.58  | 0.051                 |
| 7.5       | 604  | 365             | 239             | 0.4             | 0.58  | 0.967                 |
| 7.5       | 780  | 450             | 330             | 0.42            | 0.58  | 0.243                 |
| 10        | 604  | 365             | 239             | 0.4             | 0.58  | 0.967                 |
| 10        | 1396 | 835             | 561             | 0.4             | 0.58  | 0.967                 |
| 15        | 604  | 365             | 239             | 0.4             | 0.58  | 0.967                 |
| 15        | 1396 | 835             | 561             | 0.4             | 0.58  | 0.967                 |
| 20        | 604  | 365             | 239             | 0.4             | 0.58  | 0.967                 |
| 20        | 1396 | 835             | 561             | 0.4             | 0.58  | 0.967                 |
| 25        | 604  | 365             | 239             | 0.4             | 0.58  | 0.967                 |
| 25        | 1396 | 835             | 561             | 0.4             | 0.58  | 0.967                 |
| 30        | 2000 | 1200            | 800             | 0.4             | 0.58  | 0.967                 |

Table S4: The same as Table S2 for  $N_{\text{Ag}}^*=1000$  system.

| time (ns) | $N$  | $N_{\text{Au}}$ | $N_{\text{Ag}}$ | $x_{\text{Ag}}$ | $Q_6$ | $P(N_{\text{Ag}}, N)$ |
|-----------|------|-----------------|-----------------|-----------------|-------|-----------------------|
| 5         | 737  | 363             | 374             | 0.51            | 0.65  | 0.878                 |
| 5         | 633  | 320             | 313             | 0.49            | 0.65  | 0.945                 |
| 5         | 204  | 98              | 106             | 0.52            | 0.65  | 0.84                  |
| 5         | 100  | 47              | 53              | 0.53            | 0.65  | 0.827                 |
| 5         | 132  | 67              | 65              | 0.49            | 0.65  | 0.984                 |
| 5         | 194  | 105             | 89              | 0.46            | 0.58  | 0.481                 |
| 7.5       | 633  | 320             | 313             | 0.49            | 0.65  | 0.945                 |
| 7.5       | 941  | 461             | 480             | 0.51            | 0.65  | 0.696                 |
| 7.5       | 426  | 219             | 207             | 0.49            | 0.65  | 0.807                 |
| 10        | 1363 | 680             | 683             | 0.5             | 0.65  | 0.99                  |
| 10        | 632  | 320             | 312             | 0.49            | 0.65  | 0.929                 |
| 15        | 1367 | 680             | 687             | 0.5             | 0.66  | 0.945                 |
| 15        | 633  | 320             | 313             | 0.49            | 0.66  | 0.945                 |
| 20        | 2000 | 1000            | 1000            | 0.5             | 0.66  | 1                     |
| 25        | 2000 | 1000            | 1000            | 0.5             | 0.66  | 1                     |
| 30        | 2000 | 1000            | 1000            | 0.5             | 0.66  | 1                     |

Table S5: The same as Table S2 for  $N_{\text{Ag}}^*=1200$  system.

| time (ns) | $N$  | $N_{\text{Au}}$ | $N_{\text{Ag}}$ | $x_{\text{Ag}}$ | $Q_6$ | $P(N_{\text{Ag}}, N)$ |
|-----------|------|-----------------|-----------------|-----------------|-------|-----------------------|
| 5         | 268  | 106             | 162             | 0.6             | 0.65  | 0.987                 |
| 5         | 439  | 156             | 283             | 0.64            | 0.66  | 0.094                 |
| 5         | 381  | 170             | 211             | 0.55            | 0.65  | 0.126                 |
| 5         | 475  | 199             | 276             | 0.58            | 0.66  | 0.629                 |
| 5         | 250  | 107             | 143             | 0.57            | 0.65  | 0.629                 |
| 5         | 187  | 62              | 125             | 0.67            | 0.66  | 0.128                 |
| 7.5       | 268  | 106             | 162             | 0.6             | 0.66  | 0.987                 |
| 7.5       | 381  | 170             | 211             | 0.55            | 0.65  | 0.126                 |
| 7.5       | 439  | 156             | 283             | 0.64            | 0.65  | 0.094                 |
| 7.5       | 250  | 107             | 143             | 0.57            | 0.65  | 0.629                 |
| 7.5       | 662  | 261             | 401             | 0.61            | 0.65  | 0.934                 |
| 10        | 1088 | 432             | 656             | 0.6             | 0.65  | 0.958                 |
| 10        | 250  | 107             | 143             | 0.57            | 0.66  | 0.629                 |
| 10        | 652  | 260             | 392             | 0.6             | 0.65  | 0.997                 |
| 15        | 250  | 107             | 143             | 0.57            | 0.65  | 0.629                 |
| 15        | 998  | 375             | 623             | 0.62            | 0.66  | 0.087                 |
| 15        | 752  | 318             | 434             | 0.58            | 0.65  | 0.27                  |
| 20        | 1997 | 799             | 1198            | 0.6             | 0.66  | 1                     |
| 25        | 2000 | 800             | 1200            | 0.6             | 0.66  | 1                     |
| 30        | 2000 | 800             | 1200            | 0.6             | 0.66  | 1                     |

Table S6: The same as Table S2 for  $N_{\text{Ag}}^*=1600$  system.

| time (ns) | $N$  | $N_{\text{Au}}$ | $N_{\text{Ag}}$ | $x_{\text{Ag}}$ | $Q_6$ | $P(N_{\text{Ag}}, N)$ |
|-----------|------|-----------------|-----------------|-----------------|-------|-----------------------|
| 5         | 199  | 20              | 179             | 0.9             | 0.66  | 0.0004                |
| 5         | 172  | 47              | 125             | 0.73            | 0.66  | 0.053                 |
| 5         | 643  | 142             | 501             | 0.78            | 0.65  | 0.281                 |
| 5         | 415  | 72              | 343             | 0.83            | 0.66  | 0.307                 |
| 5         | 571  | 119             | 452             | 0.79            | 0.66  | 0.839                 |
| 7.5       | 571  | 119             | 452             | 0.79            | 0.66  | 0.839                 |
| 7.5       | 415  | 72              | 343             | 0.83            | 0.65  | 0.307                 |
| 7.5       | 1014 | 209             | 805             | 0.79            | 0.65  | 0.786                 |
| 10        | 415  | 72              | 343             | 0.83            | 0.66  | 0.307                 |
| 10        | 568  | 119             | 449             | 0.79            | 0.66  | 0.801                 |
| 10        | 1014 | 209             | 805             | 0.79            | 0.66  | 0.786                 |
| 15        | 1207 | 237             | 970             | 0.8             | 0.65  | 0.882                 |
| 15        | 777  | 161             | 616             | 0.79            | 0.65  | 0.814                 |
| 15        | 16   | 2               | 14              | 0.88            | 0.65  | 0.728                 |
| 20        | 2000 | 400             | 1600            | 0.8             | 0.66  | 1                     |
| 25        | 2000 | 400             | 1600            | 0.8             | 0.66  | 1                     |
| 30        | 2000 | 400             | 1600            | 0.8             | 0.66  | 1                     |

Table S7: The same as Table S1 for pure Au nanoclusters ( $N_{\text{Au}}^*=2000$  system).

| time (ns) | $N$  | $N_{\text{Au}}$ | $N_{\text{Ag}}$ | $x_{\text{Ag}}$ | $Q_6$ |
|-----------|------|-----------------|-----------------|-----------------|-------|
| 5         | 441  | 441             | 0               | 0               | 0.58  |
| 5         | 400  | 400             | 0               | 0               | 0.58  |
| 5         | 85   | 85              | 0               | 0               | 0.65  |
| 5         | 18   | 18              | 0               | 0               | 0.65  |
| 5         | 120  | 120             | 0               | 0               | 0.66  |
| 5         | 334  | 334             | 0               | 0               | 0.58  |
| 5         | 127  | 127             | 0               | 0               | 0.61  |
| 5         | 185  | 185             | 0               | 0               | 0.58  |
| 5         | 196  | 196             | 0               | 0               | 0.58  |
| 5         | 90   | 90              | 0               | 0               | 0.65  |
| 7.5       | 127  | 127             | 0               | 0               | 0.61  |
| 7.5       | 85   | 85              | 0               | 0               | 0.65  |
| 7.5       | 189  | 189             | 0               | 0               | 0.58  |
| 7.5       | 1127 | 1127            | 0               | 0               | 0.58  |
| 7.5       | 472  | 472             | 0               | 0               | 0.58  |
| 10        | 559  | 559             | 0               | 0               | 0.58  |
| 10        | 1127 | 1127            | 0               | 0               | 0.58  |
| 10        | 85   | 85              | 0               | 0               | 0.65  |
| 10        | 189  | 189             | 0               | 0               | 0.58  |
| 15        | 1212 | 1212            | 0               | 0               | 0.58  |
| 15        | 189  | 189             | 0               | 0               | 0.59  |
| 15        | 599  | 599             | 0               | 0               | 0.58  |
| 20        | 1401 | 1401            | 0               | 0               | 0.58  |
| 20        | 599  | 599             | 0               | 0               | 0.58  |
| 25        | 2000 | 2000            | 0               | 0               | 0.57  |
| 30        | 2000 | 2000            | 0               | 0               | 0.57  |

## Appendix (IV)

### Details for chemical reactions occurred during MD simulation:

For  $N_{Ag}^*=400$  system during time interval from 5 to 7.5 ns, the following reactions are occurred:

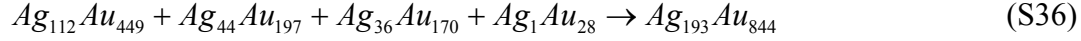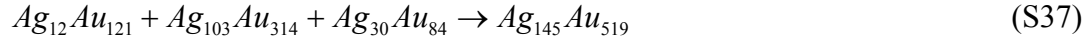

where  $Ag_{193}Au_{844}$  and  $Ag_{145}Au_{519}$  nanoclusters are stable at 7.5 ns. Now, going from 7.5 ns to 10 ns,  $Ag_{43}Au_{150}$  nanocluster is stabilized and the others join together by the following reaction:

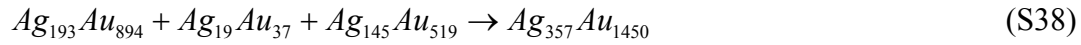

Here,  $Ag_{357}Au_{1450}$  and  $Ag_{43}Au_{150}$  nanoclusters are formed with the same  $P(N_{Ag}, N)$  and they remain stable for a longer time. For  $N_{Ag}^*=800$  system from 5 to 7.5 ns, the following reactions are taken place:

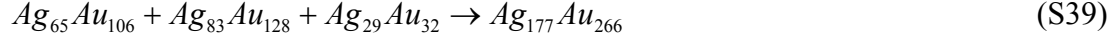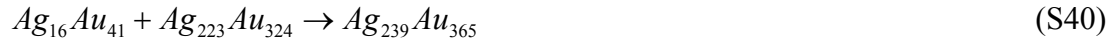

where  $Ag_{177}Au_{266}$  and  $Ag_{239}Au_{365}$  nanoclusters are present in the system at 7.5 ns. From 7.5 to 10 ns the reaction is:

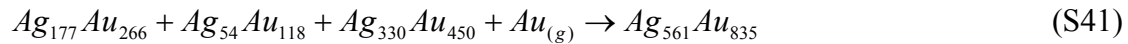

Here,  $Ag_{561}Au_{835}$  and  $Ag_{239}Au_{365}$  nanoclusters are present in the system with the same  $P(N_{Ag}, N)$  value and remain stable for a longer time. The reactions for  $N_{Ag}^*=1000$  system from 5 to 7.5 ns are:

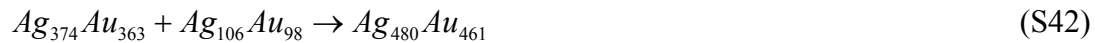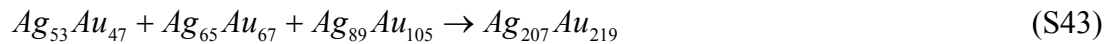

Also, from 7.5 to 10 ns the reactions are:

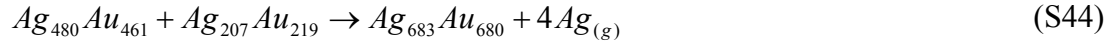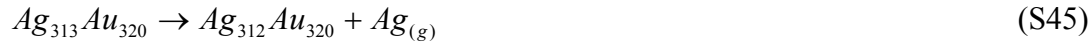

Then, from 10 to 15 ns the reactions are:

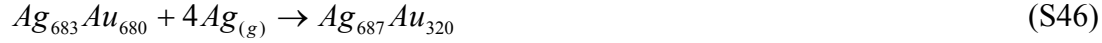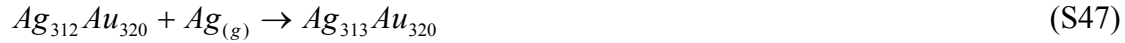

Finally, these nanoclusters aggregate. Therefore, it seems that  $N_{Ag}^*=1000$  system is more thermodynamically controlled because from 10 to 20 ns the clusters tried to be stabilized. This is in good agreement with the results of Figure 4. For  $N_{Ag}^*=1200$  system the process from 5 to 7.5 ns includes:

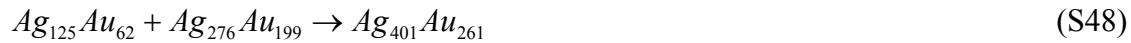

The surprising result is seen after 7.5 ns due to the fact that the process is too fast in such a way that from 7.5 to 10 ns some of the information of the system has been lost. Therefore,  $N_{Ag}^*=1200$  system is basically probability-controlled. Finally for  $N_{Ag}^*=1600$  system from 5 to 7.5 ns the reaction is:

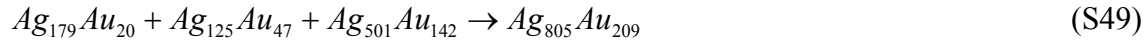

Also, for 7.5 to 10 ns the only reaction is:

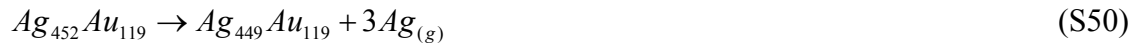

Now, the process from 10 to 15 ns is also fast and the information of 10 ns step has been lost. Please remember that a considerable fluctuation of  $\langle x_{Ag} \rangle$  was seen from 10 to 15 ns for this system in Figure 4. Therefore, the clustering process for  $N_{Ag}^*=1600$  system is considerably probability-controlled. As an overall result, increase of Ag content leads to more probability-controlled clustering process.
